# Supplementary material for: Unraveling the impact of cyclic peptide primary structure on rotaxane formation through umbrella sampling molecular dynamics simulations
Source: Royal Society of Chemistry journal article supplement (doi:10.1039/d5cp02051d), 2025-12-26
Supplement: d5cp02051d1.pdf [file d5cp02051d1.pdf]

## Supporting Information

# Unraveling the impact of cyclic peptide primary structure on rotaxane formation through umbrella sampling molecular dynamics simulations

*Taichi Kurita<sup>a</sup> Joan Gimenez-Dejoz<sup>\*b</sup> Sonia Romero-Téllez<sup>b</sup> Victor Guallar<sup>b,c</sup> and Keiji Numata<sup>\*a,d,e</sup>*

*<sup>a</sup>Department of Material Chemistry, Graduate School of Engineering, Kyoto University, Katsura, Nishikyo-ku, Kyoto 615-8510, Japan*

*<sup>b</sup>Department of Life Sciences, Barcelona Supercomputing Center (BSC), Jordi Girona 31, 08034 Barcelona, Spain*

*<sup>c</sup>Institució Catalana de Recerca i Estudis Avançats (ICREA), 08010 Barcelona, Spain*

*<sup>d</sup>Biomacromolecules Research Team, RIKEN Center for Sustainable Resource Science, 2-1 Hirosawa, Wako, Saitama 351-0198, Japan*

*<sup>e</sup>Institute for Advanced Biosciences, Keio University, Nipponkoku 403-1, Daihouji, Tsuruoka, Yamagata 997-0017, Japan*

*E-mail: joan.gimenezd@gmail.com; keiji.numata@riken.jp*

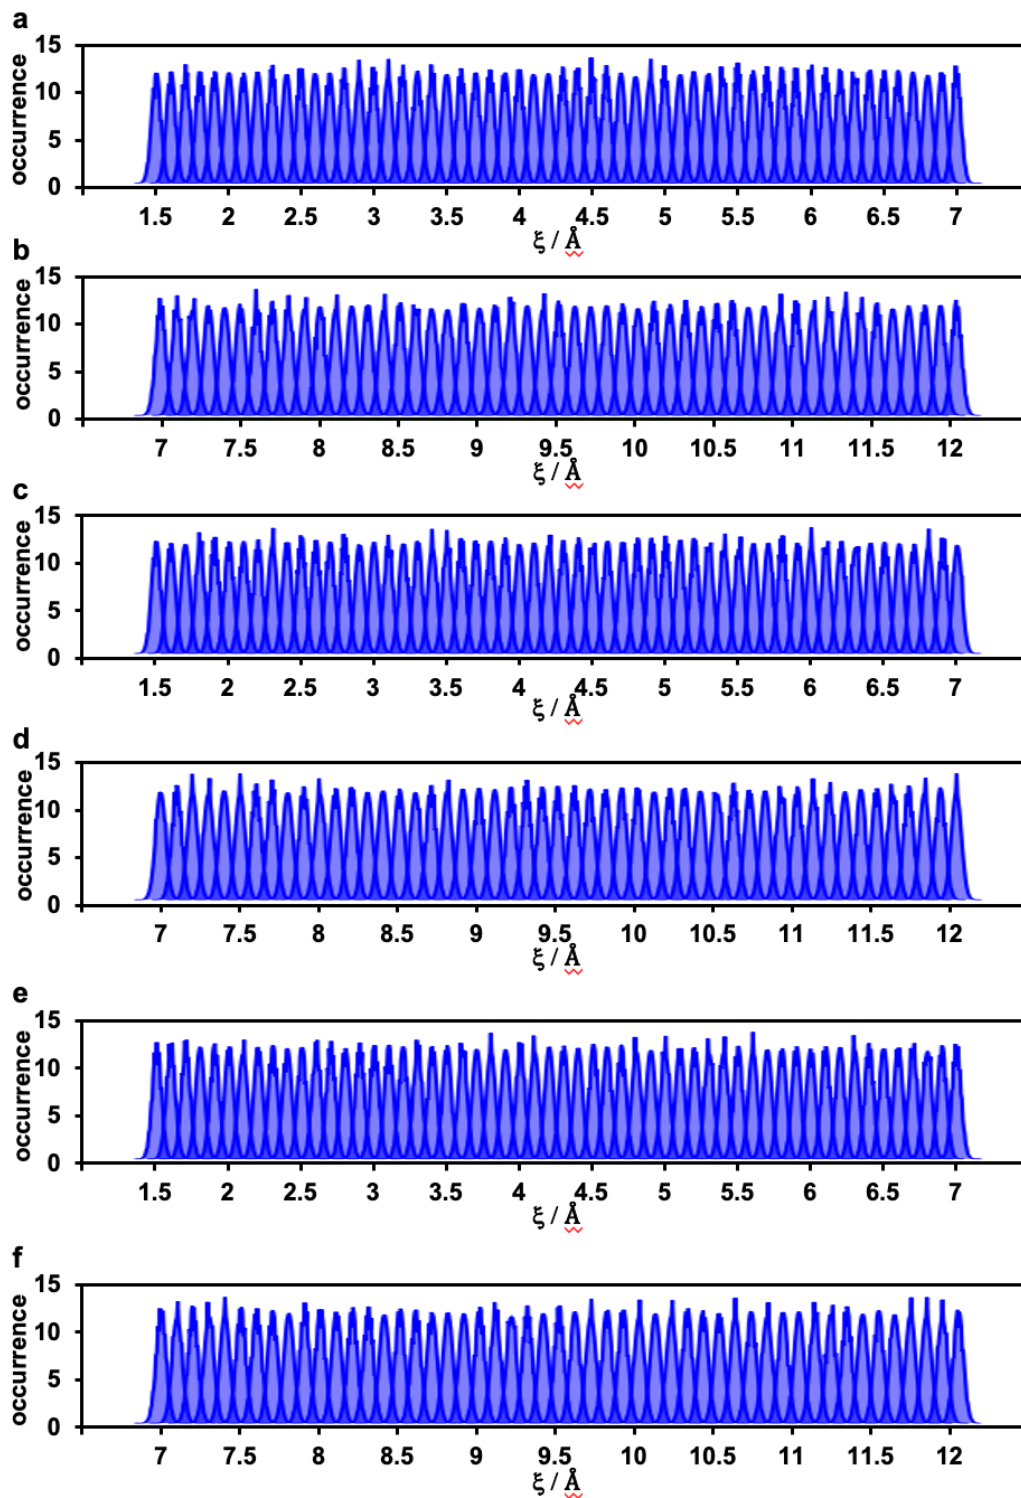

**Fig. S1.** Histogram from the umbrella sampling simulations of the rotaxane system, presented in two subpanels per system: (a, b) cyclo(PG)<sub>4</sub>, (c, d) cyclo[(PG)<sub>3</sub>PC(StBu)], and (e, f) cyclo[GC(Ψ<sup>Me</sup>,MePro)(GP)<sub>3</sub>].

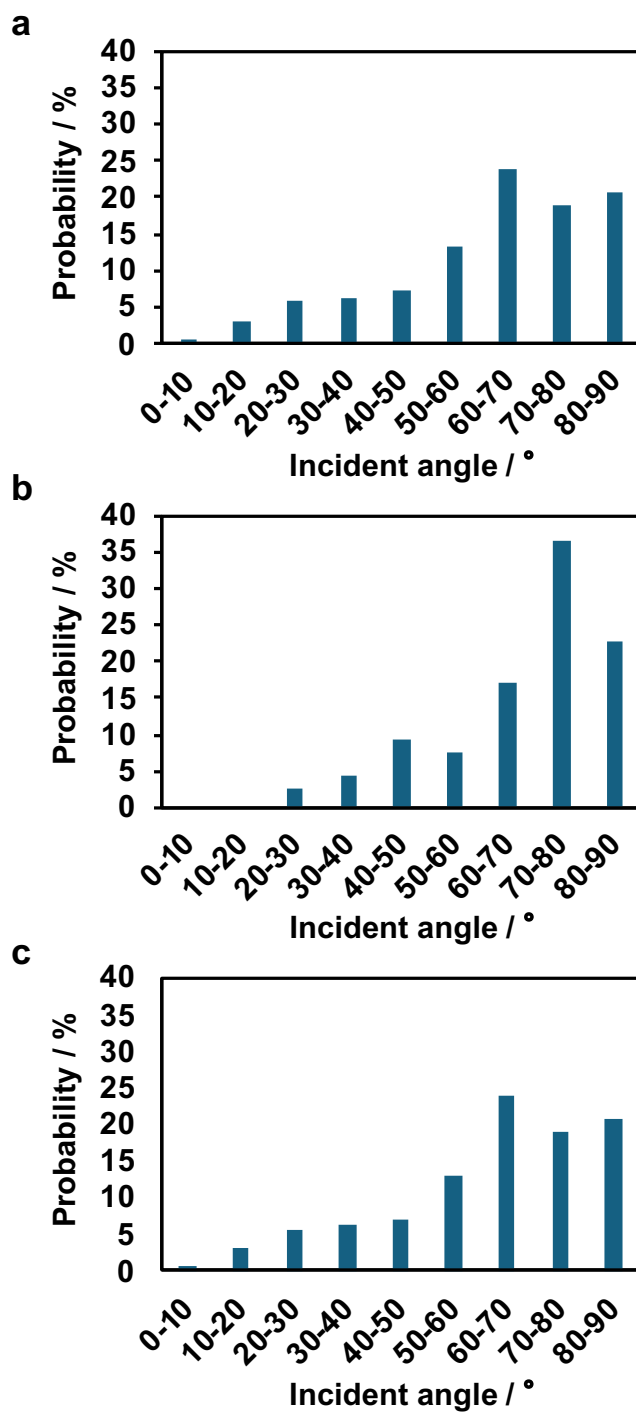

**Fig. S2.** Angular distributions of the incident angle in the pre-contact region for (a) cyclo(PG)<sub>4</sub>, (b) cyclo[(PG)<sub>3</sub>PC(StBu)], and (c) cyclo[GC(Ψ<sup>Me,Me</sup>Pro)(GP)<sub>3</sub>].

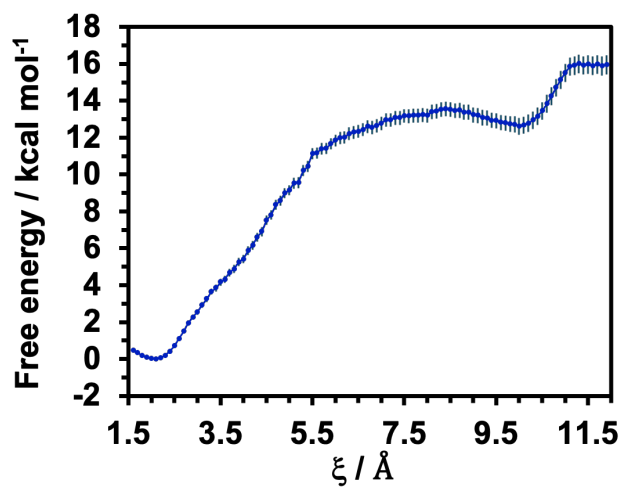

**Fig. S3.** Free energy profile for the rotaxane system composed of cyclo(PG)<sub>4</sub> and the thread using different initial structure from Fig 2. The vertical bars indicate the standard error.

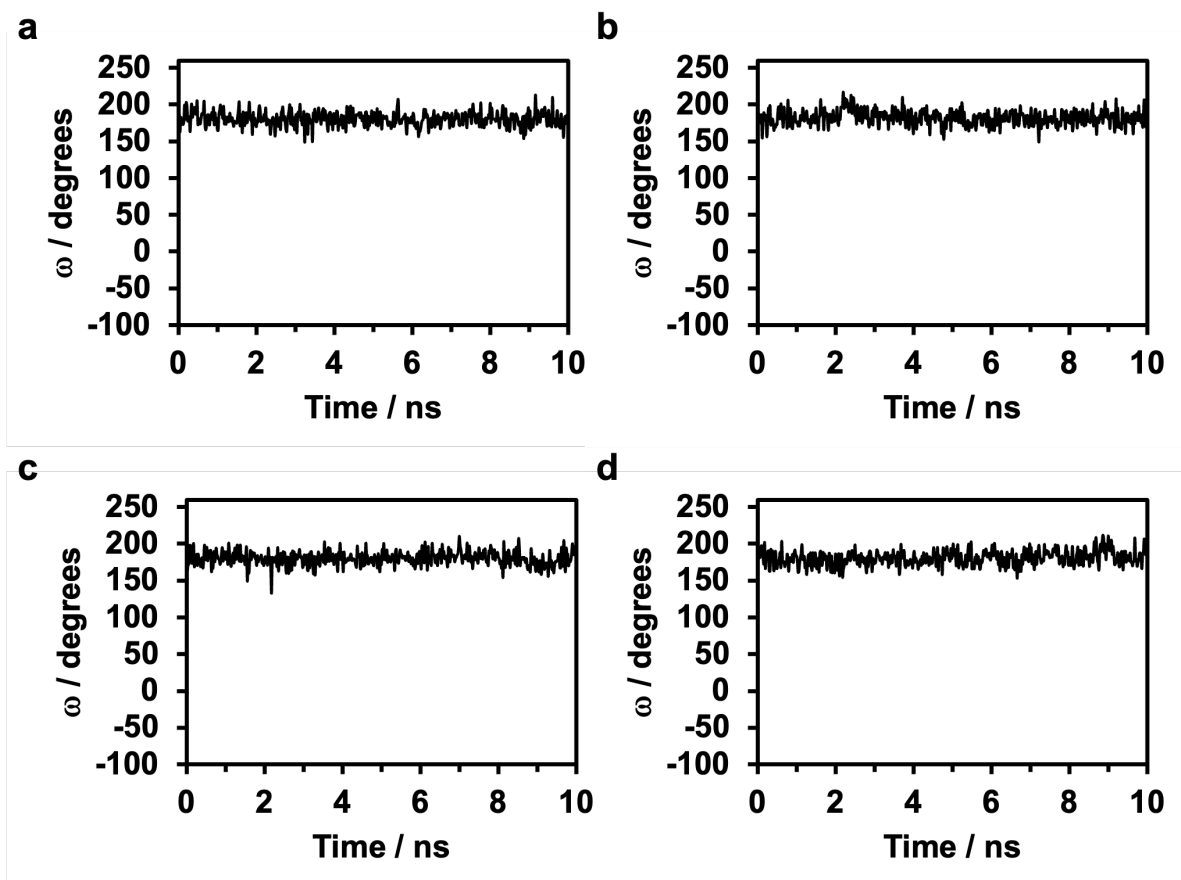

**Fig. S4.** Time courses of the  $\omega$  angle for the amide bond preceding each proline in cyclo(PG)<sub>4</sub> during 10 ns of umbrella-sampling MD simulation ( $\xi = 2.1$  Å).  $\omega$  is defined as the dihedral  $C\alpha_{\{i-1\}}-C_{\{i-1\}}-N_i-C\alpha_i$  about the amide bond  $C_{\{i-1\}}-N_i$ ; *trans* and *cis* correspond to  $\omega \approx 180^\circ$  and  $\omega \approx 0^\circ$ , respectively. Subpanels report the  $\omega$  time series for the specified Gly-Pro peptide bond: the amide bond (a) between Gly8 and Pro1, (b) between Gly2 and Pro3, (c) between Gly4 and Pro5, and (d) between Gly6 and Pro7.

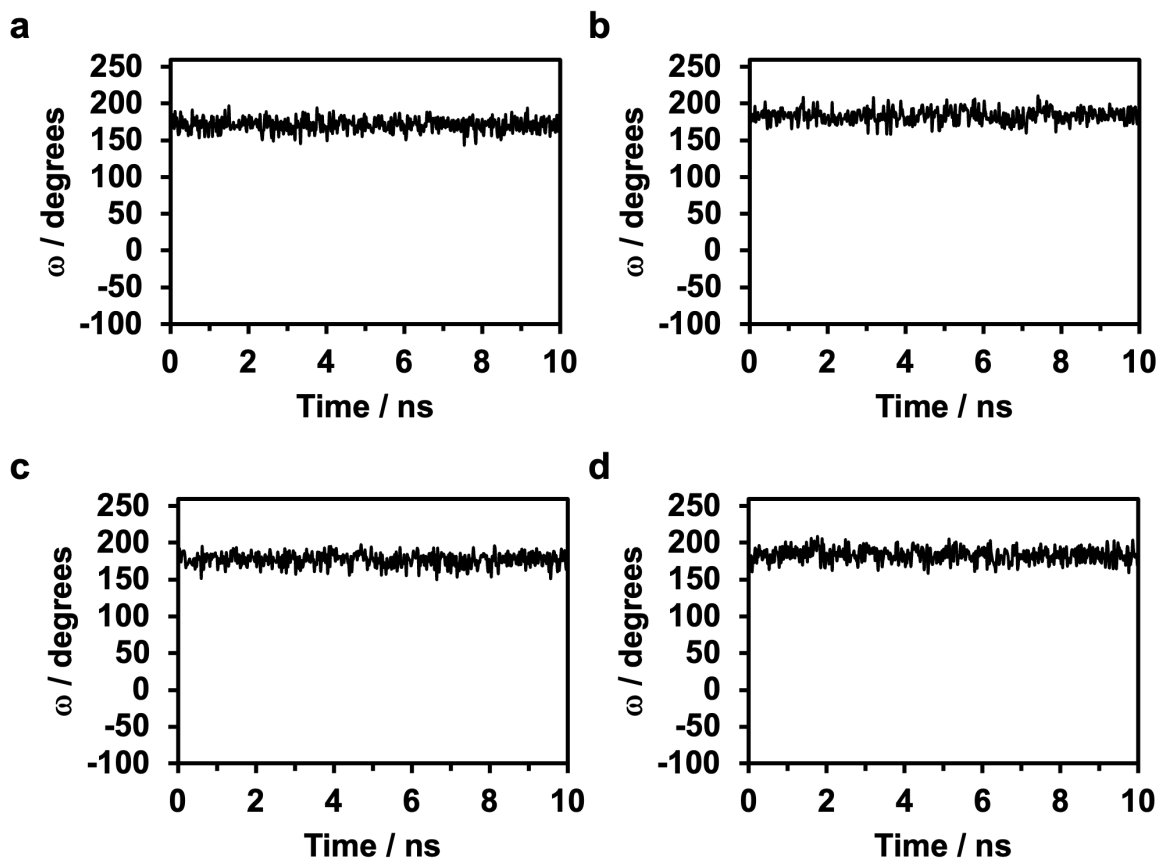

**Fig. S5.** Time courses of the  $\omega$  angle for the amide bond preceding each proline in cyclo[(PG)<sub>3</sub>PC(StBu)] during 10 ns of umbrella-sampling MD simulation ( $\xi = 1.6$  Å).  $\omega$  is defined as in Fig. S3. Subpanels report the  $\omega$  time series for the specified amide bond (a) between Gly8 and Pro1, (b) between C(StBu)2 and Pro3, (c) between Gly4 and Pro5, and (d) between Gly6 and Pro7.

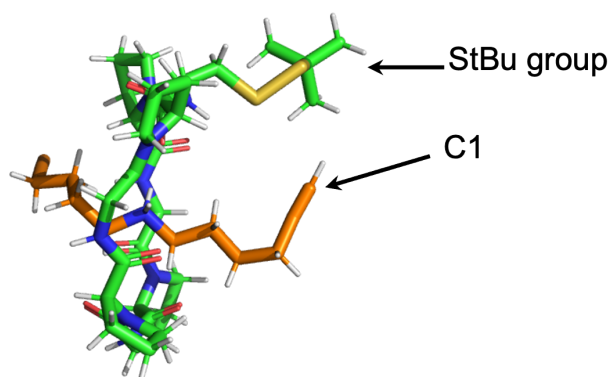

**Fig. S6.** Schematic representation of steric hindrance induced by C(StBu) residue on the C1 atom of the thread.

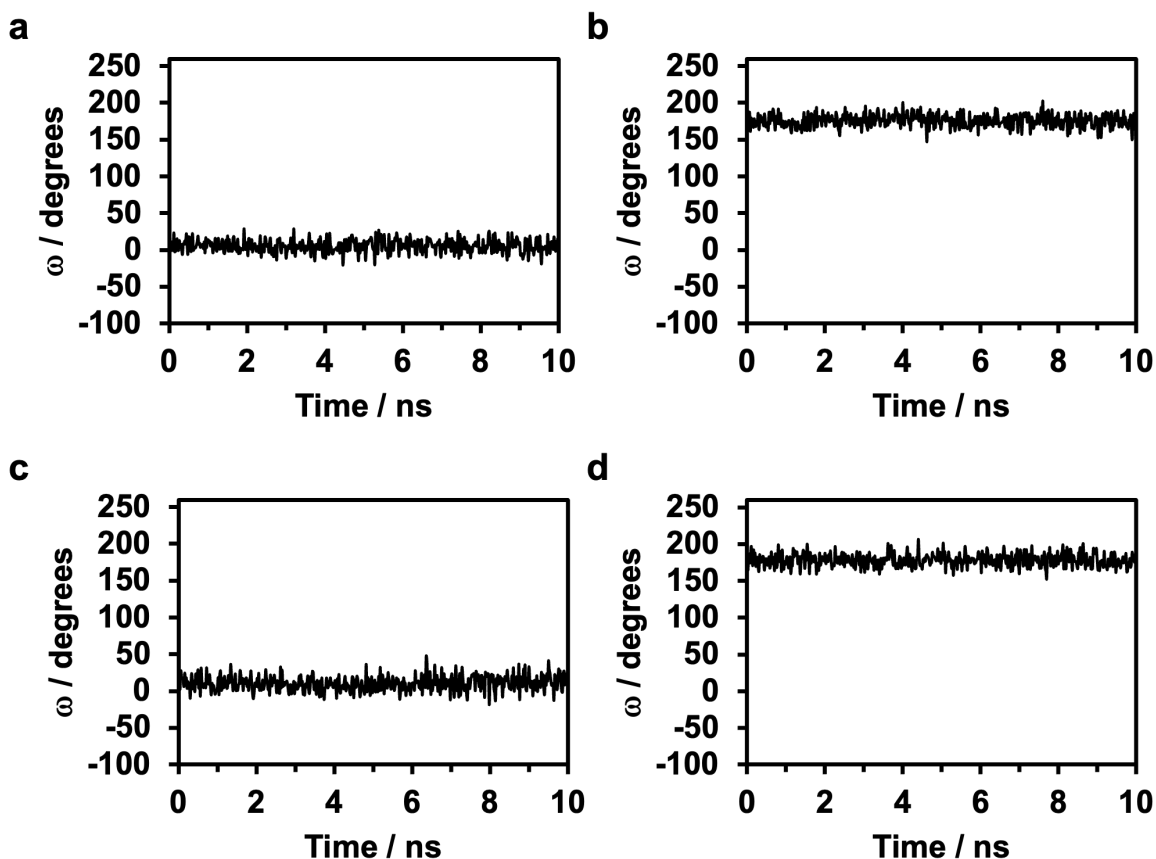

**Fig. S7.** Time courses of the  $\omega$  angle for the amide bond preceding each proline (including  $C(\Psi^{\text{Me,MePro}})$ ) in  $\text{cyclo}[\text{GC}(\Psi^{\text{Me,MePro}})(\text{GP})_3]$  during 10 ns of umbrella-sampling MD simulation ( $\xi = 4.0 \text{ \AA}$ ).  $\omega$  is defined as in Fig. S3. Subpanels report the  $\omega$  time series for the specified amide bond (a) between Gly8 and  $C(\Psi^{\text{Me,MePro}})1$ , (b) between Gly2 and Pro3, (c) between Gly4 and Pro5, and (d) between Gly6 and Pro7.



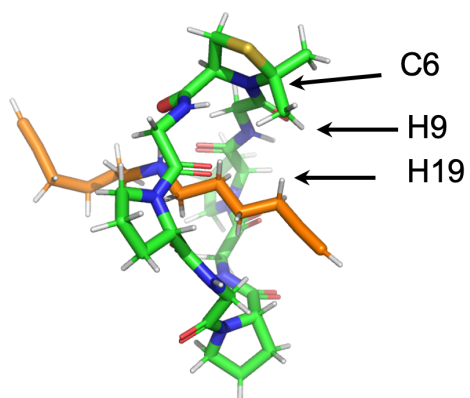

**Fig. S8.** Schematic representation of steric hindrance induced by C( $\Psi^{\text{Me,Me}}\text{Pro}$ ) residue on the H19 atom of the thread.

**Table S1.** Average distances between the atoms of the dimethyl group in cyclo[GC( $\Psi^{\text{Me,Me}}\text{Pro}$ )(GP)<sub>3</sub>] and the atoms on the thread.

| Atom<br>cyclo[GC( $\Psi^{\text{Me,Me}}\text{Pro}$ )(GP) <sub>3</sub> ] | Atom<br>in thread | Percentage of atoms<br>within 4 Å / % | Average<br>distance / Å |
|------------------------------------------------------------------------|-------------------|---------------------------------------|-------------------------|
| C6                                                                     | H19               | 100                                   | 3.05                    |
| H6                                                                     | H19               | 95.6                                  | 2.90                    |
| H9                                                                     | H19               | 94.0                                  | 2.84                    |
| H11                                                                    | H19               | 92.0                                  | 3.00                    |
| H9                                                                     | C10               | 65.4                                  | 3.49                    |
| C6                                                                     | H15               | 63.0                                  | 3.76                    |
| H9                                                                     | H15               | 58.6                                  | 3.37                    |
| H11                                                                    | C10               | 53.4                                  | 3.49                    |
| H9                                                                     | H18               | 45.6                                  | 3.55                    |
| H11                                                                    | H15               | 44.8                                  | 3.34                    |
| H11                                                                    | H18               | 38.0                                  | 3.54                    |
| H11                                                                    | C8                | 16.4                                  | 3.79                    |

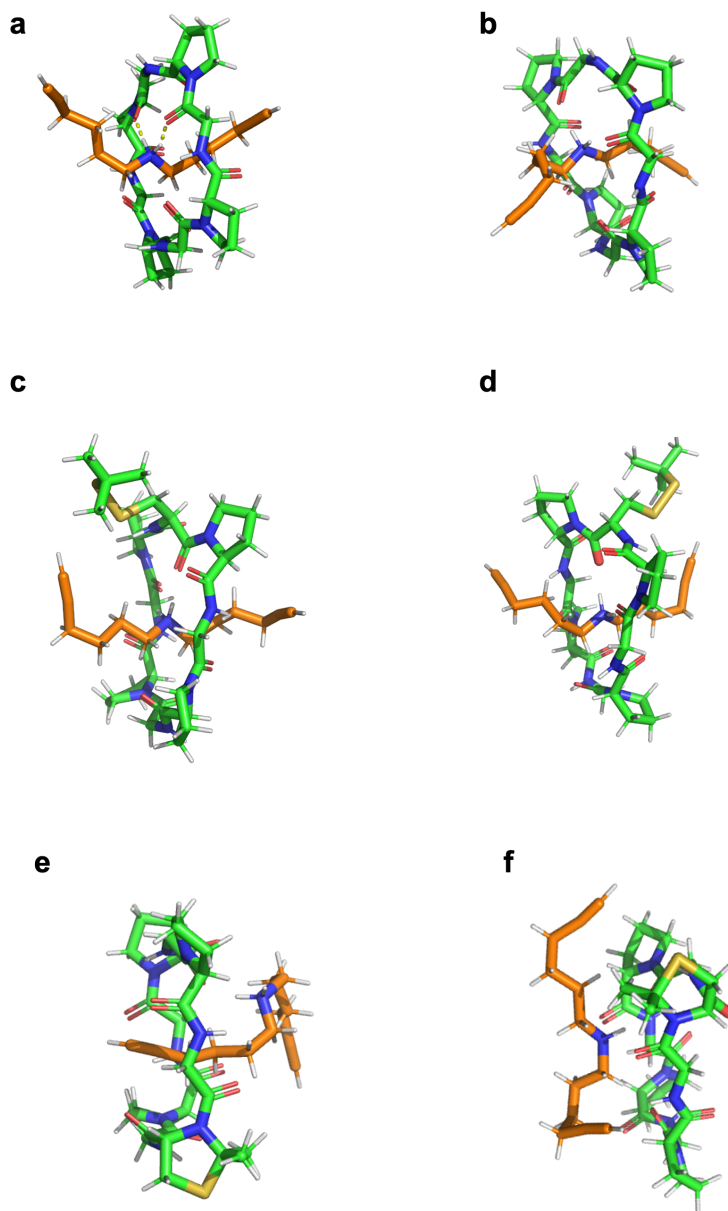

**Fig. S9.** Snapshots of three rotaxane system at the start (before) and end (after) of conventional MD runs initiated from umbrella-sampling minima: cyclo(PG)<sub>4</sub> (a) before ( $t = 0$ ) and (b) after ( $t = 1 \mu\text{s}$ ); cyclo[(PG)<sub>3</sub>PC(StBu)] (c) before ( $t = 0$ ) and (d) after ( $t = 1 \mu\text{s}$ ); cyclo[GC(Ψ<sup>Me,Me</sup>Pro)(GP)<sub>3</sub>] (e) before ( $t = 0$ ) and (f) after ( $t = 50 \text{ ns}$ ). Solvent and ions omitted for clarity.

**Table S2.** MM-PBSA energy decomposition of binding between the thread and the cyclic peptide in cyclo(PG)<sub>4</sub> and cyclo[(PG)<sub>3</sub>PC(StBu)], based on 1  $\mu$ s conventional MD simulations. All energies are in kcal/mol.  $\Delta E_{VDW}$ : van der Waals energy,  $\Delta E_{ELE}$ : electrostatic energy,  $\Delta E_{EPB}$ : polar solvation energy,  $\Delta E_{ENPOLAR}$ : nonpolar solvation energy,  $\Delta G_{GAS}$ : total gas phase energy ( $\Delta E_{VDW} + \Delta E_{ELE}$ ),  $\Delta G_{SOLV}$ : total solvation energy ( $\Delta E_{EPB} + \Delta E_{ENPOLAR}$ ),  $\Delta G_{TOTAL}$ : binding free energy ( $\Delta G_{GAS} + \Delta G_{SOLV}$ )

| Energy Component     | cyclo(PG) <sub>4</sub> | cyclo[(PG) <sub>3</sub> PC(StBu)] |
|----------------------|------------------------|-----------------------------------|
| $\Delta E_{VDWAALS}$ | -14.2                  | -16.0                             |
| $\Delta E_{ELE}$     | -80.7                  | -72.8                             |
| $\Delta E_{EPB}$     | 38.9                   | 38.1                              |
| $\Delta E_{ENPOLAR}$ | -1.1                   | -1.2                              |
| $\Delta G_{GAS}$     | -95.0                  | -88.8                             |
| $\Delta G_{SOLV}$    | 37.8                   | 36.9                              |
| $\Delta G_{TOTAL}$   | -57.2                  | -51.9                             |
